# Supplementary material
Source: PubMed Central journal article supplement (PMC4787985)
Supplement: cham824912.wt1_default.pdf [file cham824912.wt1_default.pdf]

Summary data for propensity score matched cases and controls

|              | Patients not treated with PPI | Patients treated with PPI |
|--------------|-------------------------------|---------------------------|
| Mean         | 25.601                        | 25.603                    |
| Minimum      | 6.819                         | 6.660                     |
| 10th centile | 12.841                        | 12.841                    |
| 25th centile | 17.067                        | 17.067                    |
| 75th centile | 31.526                        | 31.526                    |
| 90th centile | 39.230                        | 39.238                    |
| Maximum      | 93.044                        | 93.731                    |
| Sum          | 106 473.2                     | 106 482.7                 |
