# Supplementary material
Source: PubMed Central journal article supplement (PMC4787985)

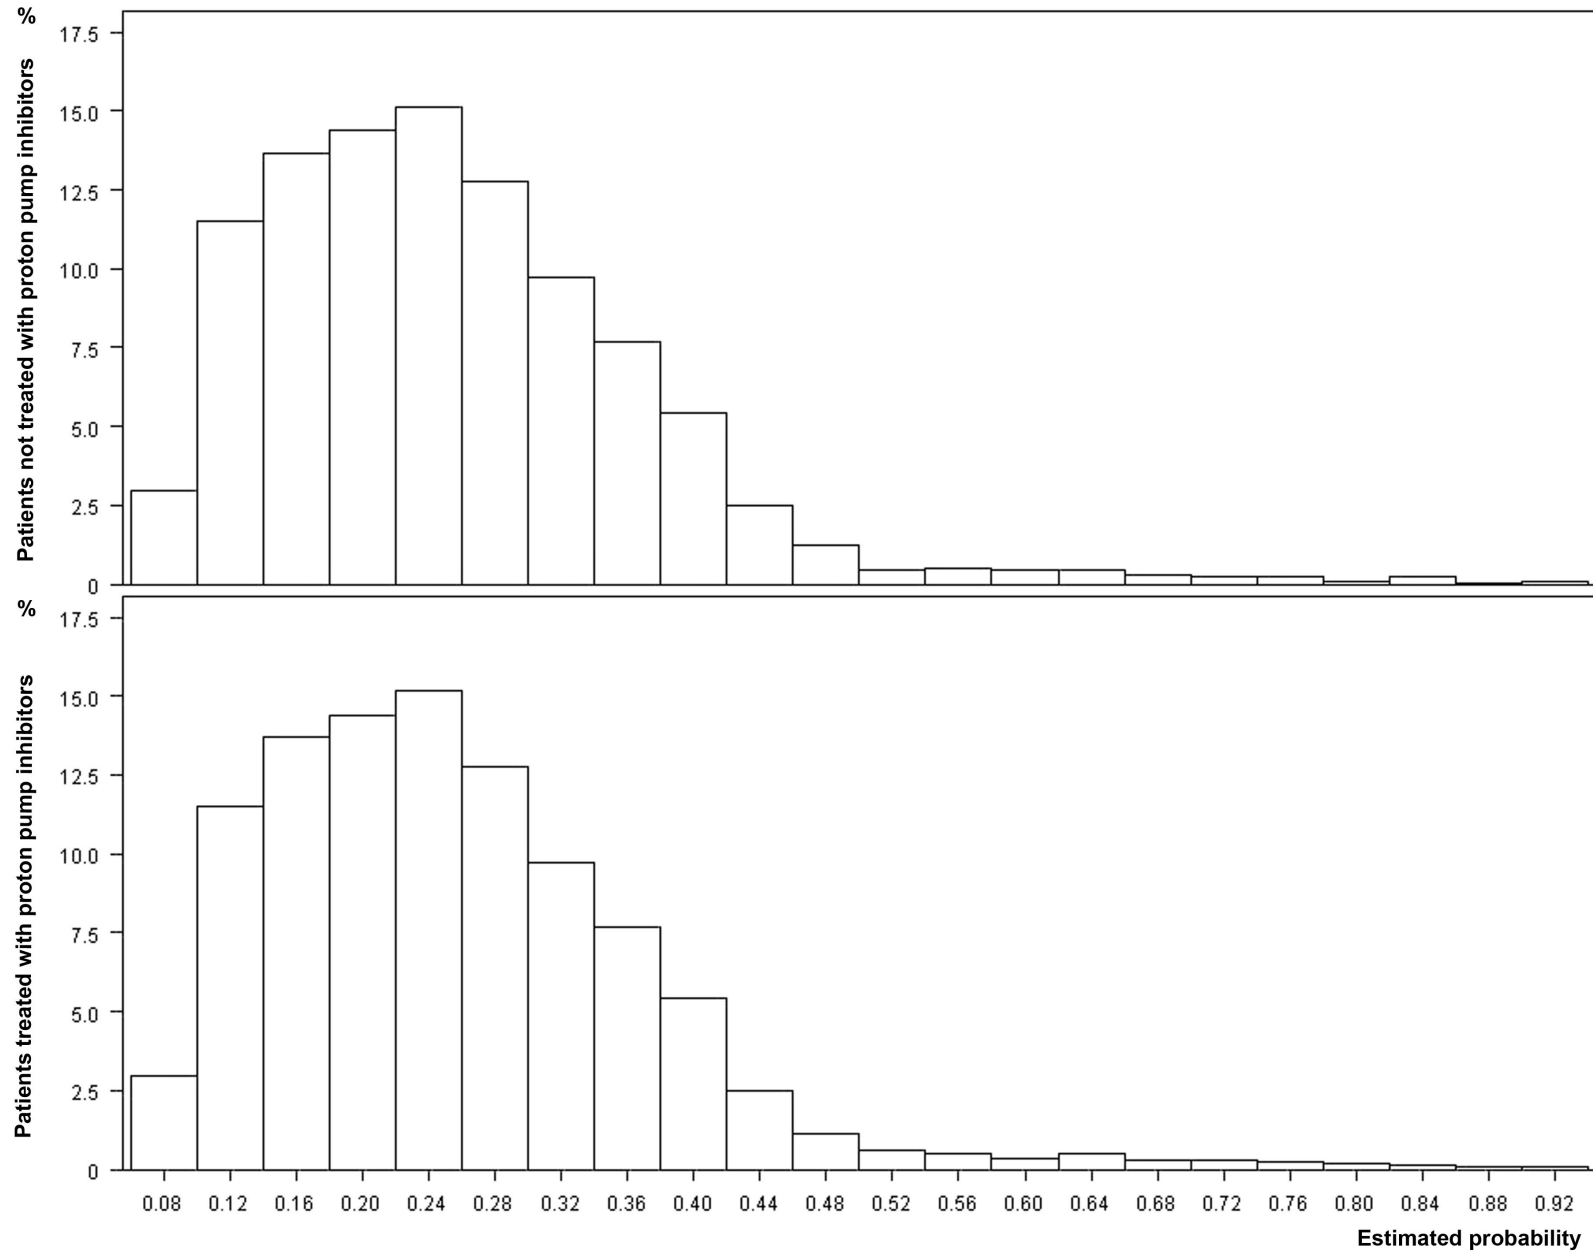

Supplement: cham824912.wf1_default.pdf [file cham824912.wf1_default.pdf]
